# Supplementary material for: Pooled Analysis of Studies Evaluating Fosnetupitant and Risk Factors for Cisplatin-Induced Nausea and Vomiting During the Extended Overall Phase
Source: Springer Nature journal article supplement (doi:10.1007/s12325-023-02648-1), 2023-09-16
Supplement: MOESM1 [file 26050802]

## **Pooled analysis of studies evaluating fosnetupitant and risk factors for cisplatin-induced nausea and vomiting during the extended overall phase**

**Naoki Inui<sup>1</sup> (ORCID: <https://orcid.org/0000-0002-4624-7119>) • Yukihiro Toi<sup>2</sup> • Yasuto Yoneshima<sup>3</sup> • Masahiro Morise<sup>4</sup> • Akito Hata<sup>5</sup> • Kaoru Kubota<sup>6</sup> (ORCID: <https://orcid.org/0000-0003-0367-2606>) • Toshiaki Saeki<sup>7</sup> • Tomohide Tamura<sup>8</sup>**

<sup>1</sup>Second Division, Department of Internal Medicine, Hamamatsu University School of Medicine, Hamamatsu, Japan

<sup>2</sup>Department of Pulmonary Medicine, Sendai Kousei Hospital, Sendai, Japan

<sup>3</sup>Department of Respiratory Medicine, Graduate School of Medical Sciences, Kyushu University, Fukuoka, Japan

<sup>4</sup>Department of Respiratory Medicine, Nagoya University Graduate School of Medicine, Nagoya, Japan

<sup>5</sup>Department of Thoracic Oncology, Kobe Minimally Invasive Cancer Center, Kobe, Japan

<sup>6</sup>Department of Pulmonary Medicine and Oncology, Graduate School of Medicine, Nippon Medical School, Tokyo, Japan

<sup>7</sup>Department of Breast Oncology, Saitama Medical University International Medical Center, Saitama, Japan

<sup>8</sup>Thoracic Center, St. Luke's International Hospital, Tokyo, Japan

### **Corresponding author**

Naoki Inui, MD, PhD

Second Division, Department of Internal Medicine

Hamamatsu University School of Medicine

1-20-1 Handayama Higashi-ku, Hamamatsu, Shizuoka 431-3192, Japan

email: [inui@hama-med.ac.jp](mailto:inui@hama-med.ac.jp)

**Table S1 List of study sites in the phase II and phase III studies**

<Phase II study; jRCT20802233009>

---

Sendai Kousei Hospital  
Hamamatsu University Hospital  
Hiroshima City Hiroshima Citizens Hospital  
Nagoya University Hospital  
Fukujuji Hospital  
Osaka International Cancer Institute  
Kitasato University Hospital, The Kitasato Institute  
Gunma Prefectural Cancer Center  
Nagaoka Chuo General Hospital  
Nagasaki University Hospital  
Aichi Cancer Center Hospital  
Yokohama Municipal Citizen's Hospital  
Osaka Medical College Hospital  
National Center for Global Health and Medicine Hospital  
Aichi Cancer Center Aichi Hospital  
Kyushu University Hospital  
Tottori University Hospital  
Teikyo University Hospital  
Kanagawa Cancer Center  
Niigata Cancer Center Hospital  
Kyorin University Hospital  
Tokyo Medical Center  
Nagaoka Red Cross Hospital  
Kameda General Hospital  
National Hospital Organization Tokyo National Hospital  
Ibaraki Prefectural Central Hospital  
Saitama Medical University International Medical Center  
Asahikawa Medical Center  
Osaka City University Hospital  
National Hospital Organization Kinki-Chuo Chest Medical Center  
Kanazawa University Hospital  
IUHW Mita Hospital  
National University Corporation Tohoku University  
Saitama Cardiovascular and Respiratory Center  
Funabashi Municipal Medical Center  
Kurume University Hospital  
Hokkaido University Hospital  
Fujita Health University Hospital  
Kobe City Medical Center General Hospital  
Yokosuka Kyosai Hospital

Hiroshima University Hospital  
St. Marianna University School of Medicine Hospital  
Niigata City General Hospital  
Fukushima Medical University Hospital  
Kumamoto University Hospital  
Tochigi Cancer Center  
Tokyo Metropolitan Tama Medical Center  
National Cancer Center Hospital  
National Hospital Organization Himeji Medical Center  
Toranomon Hospital  
Ishikawa Prefectural Central Hospital  
Shikoku Cancer Center  
National Hospital Organization Nagasaki Medical Center  
Okayama University Hospital  
Keio University Hospital  
Nara Medical University Hospital  
Tokai University Hospital  
St. Luke's International Hospital  
National Hospital Organization, Yamaguchi Ube Medical Center  
Tenri Hospital  
Tokyo Medical University Hospital  
Hyogo College Of Medicine College Hospital  
Osaka Habikino Medical Center  
National Hospital Organization Kyushu Medical Center  
Saitama Medical Center  
University of Tsukuba Hospital  
Chiba Cancer Center  
Hiratsuka Kyosai Hospital  
National Disaster Medical Center  
Jichi Medical University Hospital  
Chiba University Hospital  
University Hospital of Occupational and Environmental Health  
Institute of Biomedical Research and Innovation Hospital  
Iwate Prefectural Central Hospital

<Phase III study; jRCT2080224542>

Kobe Minimally Invasive Cancer Center  
Kyushu University Hospital  
Hamamatsu University Hospital  
Hiroshima University Hospital  
Nagoya University Hospital  
Osaka City General Hospital  
Kindai University Hospital

Saitama Cancer Center  
Sendai Kousei Hospital  
Hokkaido University Hospital  
Gunma Prefectural Cancer Center  
Osaka International Cancer Institute, Respiratory Internal Medicine  
Osaka City University Hospital  
Kitasato University Hospital  
Tohoku University Hospital  
Ureshino Medical Center  
Tottori University Hospital  
National Center for Global Health and Medicine  
Funabashi Municipal Medical Center  
Hiroshima City Hiroshima Citizens Hospital  
Yokohama Municipal Citizen's Hospital  
Shizuoka Cancer Center  
Yamaguchi Ube Medical Center  
Tokushima University Hospital  
Ishikawa Prefectural Central Hospital  
Kanazawa University Hospital  
Hokkaido Cancer Center  
Kanagawa Cancer Center  
National Hospital Organization Himeji Medical Center  
Tokyo Metropolitan Cancer and Infectious Diseases Center Komagome Hospital  
Kinki-chuo Chest Medical Center  
Hyogo Prefectural Amagasaki General Medical Center  
Nagasaki University Hospital  
The Cancer Institute Hospital of JFCR, Gastroenterological Chemotherapy  
Ibaraki Prefectural Central Hospital  
Nagaoka Red Cross Hospital  
Japan Anti-Tuberculosis Association Fukujuji Hospital  
Tochigi Cancer Center  
Niigata Cancer Center Hospital  
The Cancer Institute Hospital of JFCR, Thoracic Medical Oncology  
National Hospital Organization Kyushu Medical Center  
Saitama Medical University International Medical Center  
Hyogo College of Medicine College Hospital  
National Hospital Organization Tokyo National Hospital  
Nagaoka Chuo General Hospital  
Toho University Omori Medical Center  
International University of Health and Welfare Mita Hospital  
Osaka Medical College Hospital  
Kurume University Hospital  
Tokyo Medical University Hospital

Osaka International Cancer Institute, Head and Neck Surgery  
National Hospital Organization Nagasaki Medical Center  
Fujita Health University Hospital  
Toranomon Hospital  
Wakayama Medical University Hospital  
Kyorin University Hospital  
University Hospital, Kyoto Prefectural University of Medicine  
St. Marianna University School of Medicine Hospital  
Niigata University Medical & Dental Hospital  
Osaka Habikino Medical Center  
Yokosuka Kyosai Hospital  
Saitama Cardiovascular and Respiratory Center  
Nara Medical University Hospital  
Teikyo University Hospital  
Saitama Medical Center  
Asahikawa Medical Center  
St. Luke's International Hospital  
National Hospital Organization Tokyo Medical Center  
Okazaki City Hospital  
Tenri Hospital  
Kobe City Medical Center General Hospital  
National Cancer Center Hospital East  
Kumamoto University Hospital  
Tokyo Metropolitan Tama Medical Center  
Fukushima Medical University Hospital  
Kyoto University Hospital  
Okayama University Hospital  
Kameda General Hospital  
University of Tsukuba Hospital  
Shonan Kamakura General Hospital  
Niigata City General Hospital  
Tokai University Hospital  
Keiyukai Sapporo Hospital  
Keio University Hospital

**Table S2** Summary of background factors

| Factor                    | FosNTP 81 mg      | FosNTP 235 mg     | Placebo           | FosAPR            | Total              |
|---------------------------|-------------------|-------------------|-------------------|-------------------|--------------------|
|                           | ( <i>N</i> = 195) | ( <i>N</i> = 587) | ( <i>N</i> = 193) | ( <i>N</i> = 393) | ( <i>N</i> = 1368) |
|                           | <i>n</i> (%)       |
| <b>Age</b>                |                   |                   |                   |                   |                    |
| ≥55                       | 170 (87.2)        | 515 (87.7)        | 169 (87.6)        | 343 (87.3)        | 1197 (87.5)        |
| <55                       | 25 (12.8)         | 72 (12.3)         | 24 (12.4)         | 50 (12.7)         | 171 (12.5)         |
| <b>Sex</b>                |                   |                   |                   |                   |                    |
| Male                      | 146 (74.9)        | 449 (76.5)        | 147 (76.2)        | 302 (76.8)        | 1044 (76.3)        |
| Female                    | 49 (25.1)         | 138 (23.5)        | 46 (23.8)         | 91 (23.2)         | 324 (23.7)         |
| <b>Performance status</b> |                   |                   |                   |                   |                    |
| 0                         | 125 (64.1)        | 368 (62.7)        | 123 (63.7)        | 260 (66.2)        | 876 (64.0)         |
| 1                         | 70 (35.9)         | 219 (37.3)        | 70 (36.3)         | 133 (33.8)        | 492 (36.0)         |
| <b>Drinking history</b>   |                   |                   |                   |                   |                    |
| Yes                       | 82 (42.1)         | 255 (43.4)        | 87 (45.1)         | 181 (46.1)        | 605 (44.2)         |
| No or rarely              | 113 (57.9)        | 332 (56.6)        | 106 (54.9)        | 212 (53.9)        | 763 (55.8)         |
| <b>Smoking history</b>    |                   |                   |                   |                   |                    |
| Yes                       | 162 (83.1)        | 485 (82.6)        | 153 (79.3)        | 321 (81.7)        | 1121 (81.9)        |

| Factor                     | FosNTP 81 mg | FosNTP 235 mg | Placebo      | FosAPR       | Total        |
|----------------------------|--------------|---------------|--------------|--------------|--------------|
|                            | (N = 195)    | (N = 587)     | (N = 193)    | (N = 393)    | (N = 1368)   |
|                            | <i>n</i> (%) | <i>n</i> (%)  | <i>n</i> (%) | <i>n</i> (%) | <i>n</i> (%) |
| No                         | 33 (16.9)    | 102 (17.4)    | 40 (20.7)    | 72 (18.3)    | 247 (18.1)   |
| Motion sickness            |              |               |              |              |              |
| No                         | 176 (90.3)   | 524 (89.3)    | 166 (86.0)   | 360 (91.6)   | 1226 (89.6)  |
| Yes                        | 19 (9.7)     | 63 (10.7)     | 27 (14.0)    | 33 (8.4)     | 142 (10.4)   |
| Pregnancy-related vomiting |              |               |              |              |              |
| No                         | 22 (44.9)    | 83 (60.1)     | 20 (43.5)    | 54 (59.3)    | 179 (55.2)   |
| Yes                        | 21 (42.9)    | 37 (26.8)     | 21 (45.7)    | 27 (29.7)    | 106 (32.7)   |
| Not applicable             | 6 (12.2)     | 18 (13.0)     | 5 (10.9)     | 10 (11.0)    | 39 (12.0)    |
| Cancer type                |              |               |              |              |              |
| Other                      | 11 (5.6)     | 47 (8.0)      | 9 (4.7)      | 52 (13.2)    | 119 (8.7)    |
| Lung                       | 184 (94.4)   | 540 (92.0)    | 184 (95.3)   | 341 (86.8)   | 1249 (91.3)  |
| CDDP dose                  |              |               |              |              |              |
| <80 mg/m <sup>2</sup>      | 108 (55.4)   | 251 (42.8)    | 102 (52.8)   | 165 (42.0)   | 626 (45.8)   |
| ≥80 mg/m <sup>2</sup>      | 87 (44.6)    | 336 (57.2)    | 91 (47.2)    | 228 (58.0)   | 742 (54.2)   |

| Factor                              | FosNTP 81 mg | FosNTP 235 mg | Placebo      | FosAPR       | Total        |
|-------------------------------------|--------------|---------------|--------------|--------------|--------------|
|                                     | (N = 195)    | (N = 587)     | (N = 193)    | (N = 393)    | (N = 1368)   |
|                                     | <i>n</i> (%) | <i>n</i> (%)  | <i>n</i> (%) | <i>n</i> (%) | <i>n</i> (%) |
| <b>NK-1RA</b>                       |              |               |              |              |              |
| Placebo                             | 0 (0.0)      | 0 (0.0)       | 193 (100.0)  | 0 (0.0)      | 193 (14.1)   |
| FosAPR                              | 0 (0.0)      | 0 (0.0)       | 0 (0.0)      | 393 (100.0)  | 393 (28.7)   |
| FosNTP 81 mg                        | 195 (100.0)  | 0 (0.0)       | 0 (0.0)      | 0 (0.0)      | 195 (14.3)   |
| FosNTP 235 mg                       | 0 (0.0)      | 587 (100.0)   | 0 (0.0)      | 0 (0.0)      | 587 (42.9)   |
| <b>Treatment failure in 0–120 h</b> |              |               |              |              |              |
| No                                  | 124 (63.6)   | 445 (75.8)    | 106 (54.9)   | 279 (71.0)   | 954 (69.7)   |
| Yes                                 | 70 (35.9)    | 142 (24.2)    | 87 (45.1)    | 114 (29.0)   | 413 (30.2)   |

Data were obtained from the full analysis set

*FosNTP* fosnetupitant, *FosAPR* fosaprepitant, *CDDP* cisplatin, *NK-1RA* neurokinin 1 receptor antagonist





| Factor                     | Overall (0–120 h)   |               |                       |               |                      |               |                     |               | Acute (0–24 h)        |               |                      |               | Delayed (24–120 h)    |               |       |               |       |               |       |
|----------------------------|---------------------|---------------|-----------------------|---------------|----------------------|---------------|---------------------|---------------|-----------------------|---------------|----------------------|---------------|-----------------------|---------------|-------|---------------|-------|---------------|-------|
|                            | Univariate analysis |               | Multivariate analysis |               |                      |               | Univariate analysis |               | Multivariate analysis |               | Univariate analysis  |               | Multivariate analysis |               |       |               |       |               |       |
|                            |                     |               | Full model            |               | Backward elimination |               |                     |               | Full model            |               | Backward elimination |               |                       |               |       |               |       |               |       |
|                            | OR (95% CI)         | <i>p</i>      | OR (95% CI)           | <i>p</i>      | OR (95% CI)          | <i>p</i>      | OR (95% CI)         | <i>p</i>      | OR (95% CI)           | <i>p</i>      | OR (95% CI)          | <i>p</i>      | OR (95% CI)           | <i>p</i>      |       |               |       |               |       |
| No or rarely               | 763                 | 2.000         | <.001                 | 1.686         | <.001                | 1.663         | <.001               | 2.199         | <.001                 | 1.708         | .025                 | 1.854         | .008                  | 2.118         | <.001 | 1.764         | <.001 | 1.746         | <.001 |
|                            |                     | (1.570–2.546) |                       | (1.298–2.189) |                      | (1.283–2.155) |                     | (1.433–3.376) |                       | (1.071–2.726) |                      | (1.176–2.923) |                       | (1.653–2.713) |       | (1.350–2.305) |       | (1.339–2.278) |       |
| Smoking history            |                     |               |                       |               |                      |               |                     |               |                       |               |                      |               |                       |               |       |               |       |               |       |
| Yes                        | 1121                | 1             |                       | 1             |                      | 1             |                     | 1             |                       | 1             |                      | —             |                       | 1             |       | 1             |       | 1             |       |
| No                         | 247                 | 2.258         | <.001                 | 1.454         | .034                 | 1.466         | .030                | 2.816         | <.001                 | 1.601         | .082                 | —             |                       | 2.376         | <.001 | 1.499         | .023  | 1.514         | .020  |
|                            |                     | (1.701–2.997) |                       | (1.029–2.055) |                      | (1.038–2.069) |                     | (1.861–4.261) |                       | (0.942–2.719) |                      |               |                       | (1.786–3.162) |       | (1.057–2.126) |       | (1.068–2.145) |       |
| Motion sickness            |                     |               |                       |               |                      |               |                     |               |                       |               |                      |               |                       |               |       |               |       |               |       |
| No                         | 1226                | 1             |                       | 1             |                      | 1             |                     | 1             |                       | 1             |                      | 1             |                       | 1             |       | 1             |       | 1             |       |
| Yes                        | 142                 | 1.930         | <.001                 | 1.491         | .038                 | 1.524         | .028                | 2.470         | <.001                 | 1.676         | .059                 | 1.750         | .039                  | 2.118         | <.001 | 1.632         | .011  | 1.659         | .009  |
|                            |                     | (1.355–2.750) |                       | (1.022–2.175) |                      | (1.047–2.219) |                     | (1.504–4.055) |                       | (0.980–2.866) |                      | (1.028–2.978) |                       | (1.485–3.020) |       | (1.117–2.384) |       | (1.138–2.420) |       |
| Pregnancy-related vomiting |                     |               |                       |               |                      |               |                     |               |                       |               |                      |               |                       |               |       |               |       |               |       |
| No                         | 179                 | 1             |                       | —             |                      | —             |                     | 1             |                       | —             |                      | —             |                       | 1             |       | —             |       | —             |       |
| Yes                        | 106                 | 3.393         | <.001                 | —             |                      | —             |                     | 1.790         | .071                  | —             |                      | —             |                       | 3.613         | <.001 | —             |       | —             |       |
|                            |                     | (2.054–5.603) |                       |               |                      |               |                     | (0.952–3.364) |                       |               |                      |               |                       | (2.179–5.989) |       |               |       |               |       |

| Factor                | N    | Overall (0–120 h)   |          |                       |          |                      |          | Acute (0–24 h)      |          |                       |          |                      |          | Delayed (24–120 h)  |          |                       |          |                      |          |
|-----------------------|------|---------------------|----------|-----------------------|----------|----------------------|----------|---------------------|----------|-----------------------|----------|----------------------|----------|---------------------|----------|-----------------------|----------|----------------------|----------|
|                       |      | Univariate analysis |          | Multivariate analysis |          |                      |          | Univariate analysis |          | Multivariate analysis |          |                      |          | Univariate analysis |          | Multivariate analysis |          |                      |          |
|                       |      |                     |          | Full model            |          | Backward elimination |          |                     |          | Full model            |          | Backward elimination |          |                     |          | Full model            |          | Backward elimination |          |
|                       |      | OR (95% CI)         | <i>p</i> | OR (95% CI)           | <i>p</i> | OR (95% CI)          | <i>p</i> | OR (95% CI)         | <i>p</i> | OR (95% CI)           | <i>p</i> | OR (95% CI)          | <i>p</i> | OR (95% CI)         | <i>p</i> | OR (95% CI)           | <i>p</i> | OR (95% CI)          | <i>p</i> |
| Not applicable        | 39   | 1.834               | .091     | —                     | —        | —                    | —        | 0.538               | .333     | —                     | —        | —                    | —        | 1.788               | .108     | —                     | —        | —                    |          |
|                       |      | (0.908–3.708)       |          |                       |          |                      |          | (0.154–1.886)       |          |                       |          |                      |          | (0.880–3.633)       |          |                       |          |                      |          |
| Cancer type           |      |                     |          |                       |          |                      |          |                     |          |                       |          |                      |          |                     |          |                       |          |                      |          |
| Other                 | 119  | 1                   |          | 1                     | —        | —                    | —        | 1                   |          | 1                     | —        | —                    | 1        |                     | 1        | —                     | —        | —                    |          |
| Lung                  | 1249 | 1.090               | .683     | 0.822                 | .392     | —                    | —        | 2.136               | .105     | 1.197                 | .714     | —                    | —        | 1.095               | .675     | 0.833                 | .434     | —                    |          |
|                       |      | (0.720–1.652)       |          | (0.526–1.287)         |          |                      |          | (0.854–5.345)       |          | (0.457–3.138)         |          |                      |          | (0.717–1.672)       |          | (0.527–1.316)         |          |                      |          |
| CDDP dose             |      |                     |          |                       |          |                      |          |                     |          |                       |          |                      |          |                     |          |                       |          |                      |          |
| <80 mg/m <sup>2</sup> | 626  | 1                   |          | 1                     | —        | —                    | —        | 1                   |          | 1                     |          | 1                    |          | 1                   |          | 1                     |          | —                    |          |
| ≥80 mg/m <sup>2</sup> | 742  | 0.957               | .707     | 1.128                 | .343     | —                    | —        | 1.790               | .005     | 2.176                 | <.001    | 2.175                | <.001    | 0.910               | .430     | 1.073                 | .584     | —                    |          |
|                       |      | (0.759–1.206)       |          | (0.880–1.445)         |          |                      |          | (1.189–2.695)       |          | (1.407–3.366)         |          | (1.417–3.338)        |          | (0.719–1.151)       |          | (0.833–1.382)         |          |                      |          |
| NK-1RA                |      |                     |          |                       |          |                      |          |                     |          |                       |          |                      |          |                     |          |                       |          |                      |          |
| Placebo               | 193  | 1                   |          | 1                     | 1        | 1                    | 1        | 1                   |          | 1                     |          | 1                    |          | 1                   |          | 1                     |          | 1                    |          |
| FosAPR                | 393  | 0.498               | <.001    | 0.486                 | <.001    | 0.503                | <.001    | 0.416               | .001     | 0.393                 | .001     | 0.383                | <.001    | 0.481               | <.001    | 0.471                 | <.001    | 0.483                | <.001    |
|                       |      | (0.348–0.712)       |          | (0.335–0.706)         |          | (0.347–0.727)        |          | (0.243–0.714)       |          | (0.223–0.692)         |          | (0.218–0.671)        |          | (0.335–0.690)       |          | (0.322–0.688)         |          | (0.332–0.703)        |          |



| Factor             | Extended overall (0–168 h) |          | Extended delayed (24–168 h) |          |                      |                     |                     |          | Beyond delayed (120–168 h) |          |                      |                     |                     |          |                       |          |                      |          |
|--------------------|----------------------------|----------|-----------------------------|----------|----------------------|---------------------|---------------------|----------|----------------------------|----------|----------------------|---------------------|---------------------|----------|-----------------------|----------|----------------------|----------|
|                    |                            |          | Multivariate analysis       |          |                      | Univariate analysis |                     |          | Multivariate analysis      |          |                      | Univariate analysis |                     |          | Multivariate analysis |          |                      |          |
|                    | Univariate analysis        |          | Full model                  |          | Backward elimination |                     | Univariate analysis |          | Full model                 |          | Backward elimination |                     | Univariate analysis |          | Full model            |          | Backward elimination |          |
|                    | OR (95% CI)                | <i>p</i> | OR (95% CI)                 | <i>p</i> | OR (95% CI)          | <i>p</i>            | OR (95% CI)         | <i>p</i> | OR (95% CI)                | <i>p</i> | OR (95% CI)          | <i>p</i>            | OR (95% CI)         | <i>p</i> | OR (95% CI)           | <i>p</i> | OR (95% CI)          | <i>p</i> |
| Age                |                            |          |                             |          |                      |                     |                     |          |                            |          |                      |                     |                     |          |                       |          |                      |          |
| ≥55                | 1197                       | 1        | 1                           | —        | —                    | —                   | 1                   | 1        | —                          | —        | —                    | 1                   | 1                   | —        | —                     | —        | —                    | —        |
| <55                | 171                        | 1.355    | .071                        | 1.280    | .159                 | —                   | 1.267               | .167     | 1.183                      | .346     | —                    | 1.086               | .697                | 0.811    | .400                  | —        | —                    | —        |
|                    | (0.974–1.886)              |          | (0.908–1.806)               |          |                      |                     | (0.906–1.771)       |          | (0.834–1.678)              |          |                      |                     | (0.716–1.649)       |          | (0.498–1.321)         |          |                      |          |
| Sex                |                            |          |                             |          |                      |                     |                     |          |                            |          |                      |                     |                     |          |                       |          |                      |          |
| Male               | 1044                       | 1        | 1                           | —        | —                    | —                   | 1                   | 1        | —                          | —        | —                    | 1                   | 1                   | —        | —                     | —        | —                    | —        |
| Female             | 324                        | 2.042    | <.001                       | 1.486    | .013                 | 1.512               | .009                | 2.070    | <.001                      | 1.465    | .018                 | 1.455               | .019                | 1.690    | <.001                 | 0.917    | .700                 | —        |
|                    | (1.580–2.638)              |          | (1.087–2.031)               |          | (1.111–2.059)        |                     | (1.599–2.680)       |          | (1.069–2.008)              |          | (1.063–1.991)        |                     | (1.241–2.302)       |          | (0.590–1.425)         |          |                      |          |
| Performance status |                            |          |                             |          |                      |                     |                     |          |                            |          |                      |                     |                     |          |                       |          |                      |          |
| 0                  | 876                        | 1        | 1                           | —        | —                    | —                   | 1                   | 1        | —                          | —        | —                    | 1                   | 1                   | —        | —                     | —        | —                    | —        |
| 1                  | 492                        | 1.326    | .017                        | 1.344    | .017                 | 1.336               | .019                | 1.336    | .016                       | 1.340    | .020                 | 1.329               | .023                | 1.434    | .014                  | 1.251    | .202                 | —        |
|                    | (1.051–1.674)              |          | (1.053–1.714)               |          | (1.049–1.701)        |                     | (1.056–1.690)       |          | (1.048–1.714)              |          | (1.040–1.697)        |                     | (1.076–1.911)       |          | (0.887–1.762)         |          |                      |          |
| Drinking history   |                            |          |                             |          |                      |                     |                     |          |                            |          |                      |                     |                     |          |                       |          |                      |          |
| Yes                | 605                        | 1        | 1                           | —        | —                    | —                   | 1                   | 1        | —                          | —        | —                    | 1                   | 1                   | —        | —                     | —        | —                    | —        |

| Factor                     | Extended overall (0–168 h) |               | Extended            |               |                       |               |                     |               |                       |               |                     |               |                       |               | Beyond delayed (120–168 h) |               |             |          |
|----------------------------|----------------------------|---------------|---------------------|---------------|-----------------------|---------------|---------------------|---------------|-----------------------|---------------|---------------------|---------------|-----------------------|---------------|----------------------------|---------------|-------------|----------|
|                            |                            |               | delayed (24–168 h)  |               |                       |               |                     |               |                       |               |                     |               |                       |               |                            |               |             |          |
|                            |                            |               | Univariate analysis |               | Multivariate analysis |               | Univariate analysis |               | Multivariate analysis |               | Univariate analysis |               | Multivariate analysis |               |                            |               |             |          |
|                            |                            |               | Full model          |               | Backward elimination  |               | Full model          |               | Backward elimination  |               | Full model          |               | Backward elimination  |               |                            |               |             |          |
|                            |                            |               | OR (95% CI)         | <i>p</i>      | OR (95% CI)           | <i>p</i>      | OR (95% CI)         | <i>p</i>      | OR (95% CI)           | <i>p</i>      | OR (95% CI)         | <i>p</i>      | OR (95% CI)           | <i>p</i>      |                            |               | OR (95% CI) | <i>p</i> |
| No or rarely               | 763                        | 2.015         | <.001               | 1.746         | <.001                 | 1.733         | <.001               | 2.094         | <.001                 | 1.796         | <.001               | 1.780         | <.001                 | 1.809         | <.001                      | 1.257         | .228        | —        |
|                            |                            | (1.593–2.549) |                     | (1.355–2.250) |                       | (1.348–2.227) |                     | (1.649–2.660) |                       | (1.388–2.324) |                     | (1.378–2.298) |                       | (1.343–2.436) |                            | (0.866–1.825) |             |          |
| Smoking history            |                            |               |                     |               |                       |               |                     |               |                       |               |                     |               |                       |               |                            |               |             |          |
| Yes                        | 1121                       | 1             |                     | 1             |                       | 1             |                     | 1             |                       | 1             |                     | 1             |                       | 1             |                            | 1             |             | —        |
| No                         | 247                        | 2.150         | <.001               | 1.415         | .046                  | 1.443         | .034                | 2.221         | <.001                 | 1.451         | .034                | 1.454         | .032                  | 1.975         | <.001                      | 1.269         | .320        | —        |
|                            |                            | (1.624–2.846) |                     | (1.006–1.992) |                       | (1.028–2.025) |                     | (1.675–2.945) |                       | (1.029–2.047) |                     | (1.032–2.047) |                       | (1.422–2.743) |                            | (0.793–2.029) |             |          |
| Motion sickness            |                            |               |                     |               |                       |               |                     |               |                       |               |                     |               |                       |               |                            |               |             |          |
| No                         | 1226                       | 1             |                     | 1             |                       | —             |                     | 1             |                       | 1             |                     | 1             |                       | 1             |                            | 1             |             | —        |
| Yes                        | 142                        | 1.768         | .001                | 1.388         | .086                  | —             |                     | 1.907         | <.001                 | 1.501         | .034                | 1.521         | .028                  | 1.547         | .041                       | 0.984         | .951        | —        |
|                            |                            | (1.244–2.513) |                     | (0.955–2.018) |                       |               |                     | (1.340–2.712) |                       | (1.032–2.184) |                     | (1.047–2.210) |                       | (1.019–2.350) |                            | (0.595–1.630) |             |          |
| Pregnancy-related vomiting |                            |               |                     |               |                       |               |                     |               |                       |               |                     |               |                       |               |                            |               |             |          |
| No                         | 179                        | 1             |                     | —             |                       | —             |                     | 1             |                       | —             |                     | —             |                       | 1             |                            | —             |             | —        |

| Factor                | N    | Extended                   |          |                        |          |                             |                        |                       |                        |                            |          |                        |          |                        |      |   |
|-----------------------|------|----------------------------|----------|------------------------|----------|-----------------------------|------------------------|-----------------------|------------------------|----------------------------|----------|------------------------|----------|------------------------|------|---|
|                       |      | Extended overall (0–168 h) |          |                        |          | Extended delayed (24–168 h) |                        |                       |                        | Beyond delayed (120–168 h) |          |                        |          |                        |      |   |
|                       |      | Univariate analysis        |          | Multivariate analysis  |          | Univariate analysis         |                        | Multivariate analysis |                        | Univariate analysis        |          | Multivariate analysis  |          |                        |      |   |
|                       |      | Full model                 |          | Backward elimination   |          | Full model                  |                        | Backward elimination  |                        | Full model                 |          | Backward elimination   |          |                        |      |   |
|                       |      | OR (95% CI)                | <i>p</i> | OR (95% CI)            | <i>p</i> | OR (95% CI)                 | <i>p</i>               | OR (95% CI)           | <i>p</i>               | OR (95% CI)                | <i>p</i> | OR (95% CI)            | <i>p</i> |                        |      |   |
| Yes                   | 106  | 3.242<br>(1.965–5.348)     | <.001    | —                      | —        | 3.442<br>(2.080–5.696)      | <.001                  | —                     | —                      | 2.297<br>(1.315–4.011)     | .003     | —                      | —        |                        |      |   |
| Not applicable        | 39   | 1.793<br>(0.891–3.608)     | .102     | —                      | —        | 1.743<br>(0.864–3.519)      | .121                   | —                     | —                      | 1.185<br>(0.499–2.819)     | .700     | —                      | —        |                        |      |   |
| Cancer type           |      |                            |          |                        |          |                             |                        |                       |                        |                            |          |                        |          |                        |      |   |
| Other                 | 119  | 1                          | 1        | —                      | —        | 1                           | 1                      | —                     | —                      | 1                          | 1        | —                      | —        |                        |      |   |
| Lung                  | 1249 | 1.154<br>(0.767–1.736)     | .491     | 0.885<br>(0.571–1.371) | .583     | —                           | 1.173<br>(0.775–1.777) | .450                  | 0.918<br>(0.587–1.433) | .706                       | —        | 0.957<br>(0.584–1.569) | .862     | 0.882<br>(0.478–1.628) | .688 | — |
| CDDP dose             |      |                            |          |                        |          |                             |                        |                       |                        |                            |          |                        |          |                        |      |   |
| <80 mg/m <sup>2</sup> | 626  | 1                          | 1        | —                      | —        | 1                           | 1                      | —                     | —                      | 1                          | 1        | —                      | —        |                        |      |   |
| ≥80 mg/m <sup>2</sup> | 742  | 1.011<br>(0.806–1.267)     | .926     | 1.185<br>(0.930–1.509) | .170     | —                           | 0.957<br>(0.762–1.203) | .709                  | 1.117<br>(0.875–1.427) | .374                       | —        | 1.016<br>(0.766–1.349) | .912     | 1.123<br>(0.797–1.584) | .507 | — |

| Factor                       | Extended overall (0–168 h) |                        | Extended            |                        |                      |                        |             |                        |                            |                        |             |                        |                           |                        |                           |                        |                           |       |
|------------------------------|----------------------------|------------------------|---------------------|------------------------|----------------------|------------------------|-------------|------------------------|----------------------------|------------------------|-------------|------------------------|---------------------------|------------------------|---------------------------|------------------------|---------------------------|-------|
|                              |                            |                        | delayed (24–168 h)  |                        |                      |                        |             |                        | Beyond delayed (120–168 h) |                        |             |                        |                           |                        |                           |                        |                           |       |
|                              |                            |                        | Univariate analysis |                        |                      | Multivariate analysis  |             |                        | Univariate analysis        |                        |             | Multivariate analysis  |                           |                        |                           |                        |                           |       |
|                              |                            |                        | Full model          |                        | Backward elimination |                        | Full model  |                        | Backward elimination       |                        | Full model  |                        | Backward elimination      |                        |                           |                        |                           |       |
|                              |                            |                        | OR (95% CI)         | <i>p</i>               | OR (95% CI)          | <i>p</i>               | OR (95% CI) | <i>p</i>               | OR (95% CI)                | <i>p</i>               | OR (95% CI) | <i>p</i>               | OR (95% CI)               | <i>p</i>               |                           |                        |                           |       |
| NK-IRA                       |                            |                        |                     |                        |                      |                        |             |                        |                            |                        |             |                        |                           |                        |                           |                        |                           |       |
| Placebo                      | 193                        | 1                      | 1                   | 1                      | 1                    | 1                      | 1           | 1                      | 1                          | 1                      | 1           | 1                      | 1                         | 1                      | 1                         | —                      |                           |       |
| FosAPR                       | 393                        | 0.543<br>(0.382–0.772) | <.001               | 0.531<br>(0.368–0.766) | <.001                | 0.539<br>(0.375–0.774) | <.001       | 0.533<br>(0.374–0.760) | <.001                      | 0.526<br>(0.364–0.762) | <.001       | 0.538<br>(0.373–0.775) | <.001                     | 0.719<br>(0.473–1.092) | .122                      | 1.120<br>(0.677–1.855) | .659                      | —     |
| FosNTP<br>81 mg              | 195                        | 0.722<br>(0.483–1.081) | .114                | 0.716<br>(0.472–1.085) | .116                 | 0.707<br>(0.468–1.070) | .101        | 0.683<br>(0.455–1.026) | .066                       | 0.674<br>(0.443–1.026) | .066        | 0.675<br>(0.444–1.027) | .066                      | 0.743<br>(0.456–1.210) | .233                      | 0.916<br>(0.516–1.625) | .763                      | —     |
| FosNTP<br>235 mg             | 587                        | 0.388<br>(0.277–0.544) | <.001               | 0.363<br>(0.256–0.516) | <.001                | 0.370<br>(0.261–0.523) | <.001       | 0.388<br>(0.276–0.544) | <.001                      | 0.364<br>(0.255–0.518) | <.001       | 0.370<br>(0.260–0.526) | <.001                     | 0.477<br>(0.317–0.718) | <.001                     | 0.779<br>(0.480–1.263) | .311                      | —     |
| Treatment failure in 0–120 h |                            |                        |                     |                        |                      |                        |             |                        |                            |                        |             |                        |                           |                        |                           |                        |                           |       |
| No                           | 954                        | —                      | —                   | —                      | —                    | —                      | —           | —                      | —                          | —                      | —           | —                      | 1                         | 1                      | 1                         | 1                      | 1                         |       |
| Yes                          | 413                        | —                      | —                   | —                      | —                    | —                      | —           | —                      | —                          | —                      | —           | —                      | 20.951<br>(14.407–30.466) | <.001                  | 19.766<br>(13.453–29.043) | <.001                  | 20.951<br>(14.407–30.466) | <.001 |

Data were obtained from the full analysis set.

*h* hours, *OR* odds ratio, *CI* confidence interval, *CDDP* cisplatin, *NK-IRA* neurokinin 1 receptor antagonist, *FosAPR* fosaprepitant, *FosNTP* fosnetupitant



**Table S4** Multivariate logistic analysis of the association of treatment failure with clinical variables in each phase in the neurokinin 1 receptor antagonist evaluable population

| Treatment          |              | Overall (0–120 h)   |          |                       |          |                      |          | Acute (0–24 h)      |          |                       |          |                      |          | Delayed (24–120 h)  |          |                       |          |                      |          |               |  |               |  |
|--------------------|--------------|---------------------|----------|-----------------------|----------|----------------------|----------|---------------------|----------|-----------------------|----------|----------------------|----------|---------------------|----------|-----------------------|----------|----------------------|----------|---------------|--|---------------|--|
| Group              | Factor       | Univariate analysis |          | Multivariate analysis |          |                      |          | Univariate analysis |          | Multivariate analysis |          |                      |          | Univariate analysis |          | Multivariate analysis |          |                      |          |               |  |               |  |
|                    |              |                     |          | Full model            |          | Backward elimination |          |                     |          | Full model            |          | Backward elimination |          |                     |          | Full model            |          | Backward elimination |          |               |  |               |  |
|                    |              | OR (95% CI)         | <i>p</i> | OR (95% CI)           | <i>p</i> | OR (95% CI)          | <i>p</i> | OR (95% CI)         | <i>p</i> | OR (95% CI)           | <i>p</i> | OR (95% CI)          | <i>p</i> | OR (95% CI)         | <i>p</i> | OR (95% CI)           | <i>p</i> | OR (95% CI)          | <i>p</i> |               |  |               |  |
|                    |              |                     |          |                       |          |                      |          |                     |          |                       |          |                      |          |                     |          |                       |          |                      |          |               |  |               |  |
| FosNTP             |              |                     |          |                       |          |                      |          |                     |          |                       |          |                      |          |                     |          |                       |          |                      |          |               |  |               |  |
| Age                |              |                     |          |                       |          |                      |          |                     |          |                       |          |                      |          |                     |          |                       |          |                      |          |               |  |               |  |
| 235 mg             | ≥55          | 515                 | 1        | 1                     | —        | —                    | —        | 1                   | 1        | 1                     | —        | —                    | —        | 1                   | 1        | —                     | —        | —                    |          |               |  |               |  |
|                    | <55          | 72                  | 1.449    | .180                  | 1.263    | .418                 | —        | 2.674               | .023     | 2.615                 | .031     | 2.641                | .026     | 1.338               | .305     | 1.127                 | .687     | —                    |          |               |  |               |  |
|                    |              | (0.843–2.489)       |          | (0.718–2.224)         |          |                      |          | (1.148–6.229)       |          | (1.090–6.272)         |          |                      |          | (1.126–6.191)       |          | (0.767–2.332)         |          |                      |          | (0.629–2.021) |  |               |  |
| Sex                |              |                     |          |                       |          |                      |          |                     |          |                       |          |                      |          |                     |          |                       |          |                      |          |               |  |               |  |
|                    | Male         | 449                 | 1        | 1                     | —        | —                    | —        | 1                   | 1        | —                     | —        | —                    | 1        | 1                   | —        | —                     | —        |                      |          |               |  |               |  |
|                    | Female       | 138                 | 2.108    | <.001                 | 1.357    | .233                 | —        | 1.592               | .242     | 1.085                 | .861     | —                    | 2.119    | <.001               | 1.286    | .336                  | —        |                      |          |               |  |               |  |
|                    |              | (1.389–3.197)       |          | (0.821–2.241)         |          |                      |          | (0.731–3.468)       |          | (0.437–2.690)         |          |                      |          | (1.389–3.232)       |          | (0.770–2.147)         |          |                      |          |               |  |               |  |
| Performance status |              |                     |          |                       |          |                      |          |                     |          |                       |          |                      |          |                     |          |                       |          |                      |          |               |  |               |  |
|                    | 0            | 368                 | 1        | 1                     | —        | —                    | —        | 1                   | 1        | —                     | —        | —                    | 1        | 1                   | —        | —                     |          |                      |          |               |  |               |  |
|                    | 1            | 219                 | 1.368    | .111                  | 1.275    | .233                 | —        | 1.065               | .868     | 1.131                 | .752     | —                    | 1.417    | .081                | 1.311    | .192                  | —        |                      |          |               |  |               |  |
|                    |              | (0.931–2.010)       |          | (0.855–1.903)         |          |                      |          | (0.507–2.238)       |          | (0.526–2.434)         |          |                      |          | (0.958–2.095)       |          | (0.872–1.971)         |          |                      |          |               |  |               |  |
| Drinking history 1 |              |                     |          |                       |          |                      |          |                     |          |                       |          |                      |          |                     |          |                       |          |                      |          |               |  |               |  |
|                    | Yes          | 255                 | 1        | 1                     | 1        | —                    | —        | 1                   | 1        | —                     | —        | —                    | 1        | 1                   | —        | —                     | 1        |                      |          |               |  |               |  |
|                    | No or rarely | 332                 | 2.384    | <.001                 | 1.906    | .004                 | 2.017    | .001                | 1.940    | .102                  | 1.855    | .157                 | —        | 2.585               | <.001    | 2.045                 | .002     | 2.172                | <.001    |               |  |               |  |
|                    |              | (1.582–3.593)       |          | (1.231–2.952)         |          |                      |          | (1.317–3.089)       |          | (0.877–4.289)         |          |                      |          | (0.788–4.370)       |          | (1.692–3.949)         |          |                      |          | (1.303–3.211) |  | (1.399–3.374) |  |
| Drinking history 2 |              |                     |          |                       |          |                      |          |                     |          |                       |          |                      |          |                     |          |                       |          |                      |          |               |  |               |  |



| Treatment |                                                    | Overall (0–120 h)   |               |                       |               |                      |               | Acute (0–24 h)      |               |                       |               | Delayed (24–120 h)   |          |                       |          |               |      |               |      |
|-----------|----------------------------------------------------|---------------------|---------------|-----------------------|---------------|----------------------|---------------|---------------------|---------------|-----------------------|---------------|----------------------|----------|-----------------------|----------|---------------|------|---------------|------|
| Group     | Factor                                             | Univariate analysis |               | Multivariate analysis |               |                      |               | Univariate analysis |               | Multivariate analysis |               | Univariate analysis  |          | Multivariate analysis |          |               |      |               |      |
|           |                                                    |                     |               | Full model            |               | Backward elimination |               |                     |               | Full model            |               | Backward elimination |          |                       |          |               |      |               |      |
|           |                                                    | OR (95% CI)         | <i>p</i>      | OR (95% CI)           | <i>p</i>      | OR (95% CI)          | <i>p</i>      | OR (95% CI)         | <i>p</i>      | OR (95% CI)           | <i>p</i>      | OR (95% CI)          | <i>p</i> | OR (95% CI)           | <i>p</i> |               |      |               |      |
|           | Stop smoking prior to 180 days before registration | —                   | —             | —                     | —             | —                    | —             | —                   | —             | —                     | —             | —                    | —        | —                     | —        |               |      |               |      |
|           | Non-smoker                                         | —                   | —             | —                     | —             | —                    | —             | —                   | —             | —                     | —             | —                    | —        | —                     | —        |               |      |               |      |
|           | Motion sickness                                    |                     |               |                       |               |                      |               |                     |               |                       |               |                      |          |                       |          |               |      |               |      |
|           | No                                                 | 524                 | 1             | 1                     | 1             | 1                    | 1             | 1                   | 1             | —                     | —             | 1                    | 1        | 1                     | 1        |               |      |               |      |
|           | Yes                                                | 63                  | 2.289         | .003                  | 1.797         | .045                 | 1.901         | .026                | 1.651         | .323                  | 1.245         | .680                 | —        | 2.476                 | .001     | 1.964         | .021 | 2.045         | .013 |
|           |                                                    |                     | (1.327–3.947) |                       | (1.014–3.183) |                      | (1.082–3.342) |                     | (0.611–4.466) |                       | (0.439–3.532) |                      |          | (1.433–4.278)         |          | (1.106–3.490) |      | (1.160–3.606) |      |
|           | Pregnancy-related vomiting                         |                     |               |                       |               |                      |               |                     |               |                       |               |                      |          |                       |          |               |      |               |      |
|           | No                                                 | 83                  | 1             | —                     | —             | —                    | —             | 1                   | —             | —                     | —             | —                    | —        | 1                     | —        | —             | —    | —             | —    |
|           | Yes                                                | 37                  | 2.595         | .020                  | —             | —                    | —             | 1.132               | .866          | —                     | —             | —                    | —        | 2.926                 | .009     | —             | —    | —             | —    |
|           |                                                    |                     | (1.165–5.777) |                       |               |                      |               | (0.267–4.796)       |               |                       |               |                      |          | (1.304–6.566)         |          |               |      |               |      |
|           | Not applicable                                     | 18                  | 1.229         | .710                  | —             | —                    | —             | 0.755               | .801          | —                     | —             | —                    | —        | 1.386                 | .559     | —             | —    | —             | —    |
|           |                                                    |                     | (0.414–3.651) |                       |               |                      |               | (0.085–6.687)       |               |                       |               |                      |          | (0.464–4.142)         |          |               |      |               |      |
|           | Cancer type                                        |                     |               |                       |               |                      |               |                     |               |                       |               |                      |          |                       |          |               |      |               |      |
|           | Other                                              | 47                  | 1             | 1                     | —             | —                    | —             | 1                   | 1             | 1                     | —             | —                    | —        | 1                     | 1        | —             | —    | —             | —    |



| Treatment Group    | Extended            |          |                       |          |                      |          | Extended            |          |                       |          |                      |          | Beyond              |          |                       |          |                      |          |
|--------------------|---------------------|----------|-----------------------|----------|----------------------|----------|---------------------|----------|-----------------------|----------|----------------------|----------|---------------------|----------|-----------------------|----------|----------------------|----------|
| Factor             | overall (0–168 h)   |          |                       |          |                      |          | delayed (24–168 h)  |          |                       |          |                      |          | delayed (120–168 h) |          |                       |          |                      |          |
|                    | Univariate analysis |          | Multivariate analysis |          |                      |          | Univariate analysis |          | Multivariate analysis |          |                      |          | Univariate analysis |          | Multivariate analysis |          |                      |          |
|                    |                     |          | Full model            |          | Backward elimination |          |                     |          | Full model            |          | Backward elimination |          |                     |          | Full model            |          | Backward elimination |          |
|                    | OR                  |          | OR                    |          | OR                   |          | OR                  |          | OR                    |          | OR                   |          | OR                  |          | OR                    |          | OR                   |          |
|                    | (95% CI)            | <i>p</i> | (95% CI)              | <i>p</i> | (95% CI)             | <i>p</i> | (95% CI)            | <i>p</i> | (95% CI)              | <i>p</i> | (95% CI)             | <i>p</i> | (95% CI)            | <i>p</i> | (95% CI)              | <i>p</i> | (95% CI)             | <i>p</i> |
| Age                |                     |          |                       |          |                      |          |                     |          |                       |          |                      |          |                     |          |                       |          |                      |          |
| ≥55                | 515                 | 1        | 1                     | —        | —                    | —        | 1                   | 1        | 1                     | —        | —                    | —        | 1                   | 1        | —                     | —        | —                    | —        |
| <55                | 72                  | 1.387    | .230                  | 1.218    | .487                 | —        | 1.268               | .394     | 1.078                 | .797     | —                    | 1.549    | .190                | 1.122    | .788                  | —        | —                    | —        |
|                    | (0.813–2.365)       |          | (0.699–2.122)         |          |                      |          | (0.734–2.190)       |          | (0.609–1.909)         |          |                      |          | (0.805–2.983)       |          | (0.487–2.585)         |          |                      |          |
| Sex                |                     |          |                       |          |                      |          |                     |          |                       |          |                      |          |                     |          |                       |          |                      |          |
| Male               | 449                 | 1        | 1                     | —        | —                    | —        | 1                   | 1        | 1                     | —        | —                    | 1        | 1                   | —        | —                     | —        | —                    | —        |
| Female             | 138                 | 1.904    | .002                  | 1.184    | .503                 | —        | 1.880               | .003     | 1.103                 | .703     | —                    | 1.807    | .025                | 0.797    | .548                  | —        | —                    | —        |
|                    | (1.262–2.871)       |          | (0.721–1.944)         |          |                      |          | (1.241–2.848)       |          | (0.666–1.828)         |          |                      |          | (1.078–3.030)       |          | (0.381–1.669)         |          |                      |          |
| Performance status |                     |          |                       |          |                      |          |                     |          |                       |          |                      |          |                     |          |                       |          |                      |          |
| 0                  | 368                 | 1        | 1                     | —        | —                    | —        | 1                   | 1        | 1                     | —        | —                    | 1        | 1                   | —        | —                     | —        | —                    | —        |
| 1                  | 219                 | 1.255    | .237                  | 1.174    | .422                 | —        | 1.323               | .150     | 1.232                 | .302     | —                    | 1.397    | .177                | 1.158    | .637                  | —        | —                    | —        |
|                    | (0.861–1.831)       |          | (0.794–1.736)         |          |                      |          | (0.904–1.937)       |          | (0.829–1.832)         |          |                      |          | (0.860–2.268)       |          | (0.629–2.130)         |          |                      |          |





| Treatment Group                                    | Extended overall (0–168 h) |          |                      |                       |            |               | Extended delayed (24–168 h) |               |            |                       |                      |               | Beyond delayed (120–168 h) |               |                      |                       |  |  |
|----------------------------------------------------|----------------------------|----------|----------------------|-----------------------|------------|---------------|-----------------------------|---------------|------------|-----------------------|----------------------|---------------|----------------------------|---------------|----------------------|-----------------------|--|--|
| Factor                                             | Univariate analysis        |          |                      | Multivariate analysis |            |               | Univariate analysis         |               |            | Multivariate analysis |                      |               | Univariate analysis        |               |                      | Multivariate analysis |  |  |
|                                                    | Full model                 |          | Backward elimination |                       | Full model |               | Backward elimination        |               | Full model |                       | Backward elimination |               | Full model                 |               | Backward elimination |                       |  |  |
|                                                    | OR                         |          | OR                   |                       | OR         |               | OR                          |               | OR         |                       | OR                   |               | OR                         |               | OR                   |                       |  |  |
|                                                    | (95% CI)                   | <i>p</i> | (95% CI)             | <i>p</i>              | (95% CI)   | <i>p</i>      | (95% CI)                    | <i>p</i>      | (95% CI)   | <i>p</i>              | (95% CI)             | <i>p</i>      | (95% CI)                   | <i>p</i>      | (95% CI)             | <i>p</i>              |  |  |
| Stop smoking prior to 180 days before registration | —                          | —        | —                    | —                     | —          | —             | —                           | —             | —          | —                     | —                    | —             | —                          | —             | —                    | —                     |  |  |
| Non-smoker                                         | —                          | —        | —                    | —                     | —          | —             | —                           | —             | —          | —                     | —                    | —             | —                          | —             | —                    | —                     |  |  |
| Motion sickness                                    |                            |          |                      |                       |            |               |                             |               |            |                       |                      |               |                            |               |                      |                       |  |  |
| No                                                 | 524                        | 1        | 1                    | —                     | 1          | —             | 1                           | —             | 1          | —                     | 1                    | —             | 1                          | —             | 1                    | —                     |  |  |
| Yes                                                | 63                         | 2.030    | .011                 | 1.618                 | .097       | —             | 2.162                       | .005          | 1.743      | .056                  | 1.785                | .044          | 2.086                      | .027          | 1.106                | .811                  |  |  |
|                                                    | (1.180–3.493)              |          | (0.917–2.853)        |                       |            | (1.255–3.725) |                             | (0.986–3.083) |            | (1.016–3.138)         |                      | (1.089–3.995) |                            | (0.485–2.521) |                      |                       |  |  |
| Pregnancy-related vomiting                         |                            |          |                      |                       |            |               |                             |               |            |                       |                      |               |                            |               |                      |                       |  |  |
| No                                                 | 83                         | 1        | —                    | —                     | 1          | —             | —                           | —             | —          | —                     | 1                    | —             | —                          | —             | —                    | —                     |  |  |
| Yes                                                | 37                         | 2.449    | .028                 | —                     | —          | —             | 2.753                       | .014          | —          | —                     | 2.769                | .035          | —                          | —             | —                    | —                     |  |  |
|                                                    | (1.103–5.434)              |          |                      |                       |            | (1.232–6.153) |                             |               |            |                       | (1.073–7.149)        |               |                            |               |                      |                       |  |  |



| Treatment Group              | Extended overall (0–168 h) |               |                      |                       |            |          | Extended delayed (24–168 h) |               |            |                       |                      |          | Beyond delayed (120–168 h) |               |                      |                       |          |          |
|------------------------------|----------------------------|---------------|----------------------|-----------------------|------------|----------|-----------------------------|---------------|------------|-----------------------|----------------------|----------|----------------------------|---------------|----------------------|-----------------------|----------|----------|
| Factor                       | Univariate analysis        |               |                      | Multivariate analysis |            |          | Univariate analysis         |               |            | Multivariate analysis |                      |          | Univariate analysis        |               |                      | Multivariate analysis |          |          |
|                              | Full model                 |               | Backward elimination |                       | Full model |          | Backward elimination        |               | Full model |                       | Backward elimination |          | Full model                 |               | Backward elimination |                       |          |          |
|                              | OR                         | (95% CI)      | <i>p</i>             | OR                    | (95% CI)   | <i>p</i> | OR                          | (95% CI)      | <i>p</i>   | OR                    | (95% CI)             | <i>p</i> | OR                         | (95% CI)      | <i>p</i>             | OR                    | (95% CI) | <i>p</i> |
| Not applicable               | 18                         | 1.160         | .789                 | —                     | —          | —        | 1.304                       | .633          | —          | —                     | —                    | —        | 1.870                      | .338          | —                    | —                     | —        | —        |
|                              |                            | (0.391–3.438) |                      |                       |            |          |                             | (0.438–3.885) |            |                       |                      |          |                            | (0.520–6.723) |                      |                       |          |          |
| Cancer type                  |                            |               |                      |                       |            |          |                             |               |            |                       |                      |          |                            |               |                      |                       |          |          |
| Other                        | 47                         | 1             |                      | 1                     |            | —        | 1                           |               | 1          |                       | —                    |          | 1                          |               | 1                    |                       | —        |          |
| Lung                         | 540                        | 1.171         | .660                 | 0.970                 | .937       | —        | 1.453                       | .330          | 1.235      | .603                  | —                    |          | 1.684                      | .332          | 1.476                | .542                  | —        |          |
|                              |                            | (0.580–2.362) |                      | (0.463–2.036)         |            |          |                             | (0.685–3.081) |            | (0.557–2.737)         |                      |          |                            | (0.587–4.831) |                      | (0.422–5.156)         |          |          |
| CDDP dose                    |                            |               |                      |                       |            |          |                             |               |            |                       |                      |          |                            |               |                      |                       |          |          |
| <80 mg/m <sup>2</sup>        | 251                        | 1             |                      | 1                     |            | —        | 1                           |               | 1          |                       | —                    |          | 1                          |               | 1                    |                       | —        |          |
| ≥80 mg/m <sup>2</sup>        | 336                        | 1.057         | .771                 | 1.165                 | .446       | —        | 1.076                       | .705          | 1.183      | .411                  | —                    |          | 1.280                      | .326          | 1.617                | .135                  | —        |          |
|                              |                            | (0.728–1.535) |                      | (0.787–1.726)         |            |          |                             | (0.737–1.571) |            | (0.793–1.763)         |                      |          |                            | (0.782–2.096) |                      | (0.861–3.037)         |          |          |
| Treatment failure in 0–120 h |                            |               |                      |                       |            |          |                             |               |            |                       |                      |          |                            |               |                      |                       |          |          |
| No                           | 445                        | —             |                      | —                     |            | —        | —                           |               | —          |                       | —                    |          | 1                          |               | 1                    |                       | 1        |          |

| Treatment Group | Extended overall (0–168 h) |          |                       |          | Extended delayed (24–168 h) |          |                       |          | Beyond delayed (120–168 h) |          |                       |          |                 |       |
|-----------------|----------------------------|----------|-----------------------|----------|-----------------------------|----------|-----------------------|----------|----------------------------|----------|-----------------------|----------|-----------------|-------|
| Factor          | Univariate analysis        |          | Multivariate analysis |          | Univariate analysis         |          | Multivariate analysis |          | Univariate analysis        |          | Multivariate analysis |          |                 |       |
|                 | Full model                 |          | Backward elimination  |          | Full model                  |          | Backward elimination  |          | Full model                 |          | Backward elimination  |          |                 |       |
|                 | OR                         | <i>p</i> | OR                    | <i>p</i> | OR                          | <i>p</i> | OR                    | <i>p</i> | OR                         | <i>p</i> | OR                    | <i>p</i> |                 |       |
|                 | (95% CI)                   |          | (95% CI)              |          | (95% CI)                    |          | (95% CI)              |          | (95% CI)                   |          | (95% CI)              |          |                 |       |
| Yes             | 142                        | —        | —                     | —        | —                           | —        | —                     | —        | 34.184                     | <.001    | 31.191                | <.001    | 34.184          | <.001 |
|                 |                            |          |                       |          |                             |          |                       |          | (17.262–67.696)            |          | (15.534–62.628)       |          | (17.262–67.696) |       |

| Treatment |                    | Overall (0–120 h)   |               |                       |               |          |   |                     |      | Acute (0–24 h)        |      |          |               |                     |               |                       |               | Delayed (24–120 h) |   |  |  |  |  |  |  |
|-----------|--------------------|---------------------|---------------|-----------------------|---------------|----------|---|---------------------|------|-----------------------|------|----------|---------------|---------------------|---------------|-----------------------|---------------|--------------------|---|--|--|--|--|--|--|
| Group     | Factor             | Univariate analysis |               | Multivariate analysis |               |          |   | Univariate analysis |      | Multivariate analysis |      |          |               | Univariate analysis |               | Multivariate analysis |               |                    |   |  |  |  |  |  |  |
|           |                    |                     |               | Backward elimination  |               |          |   |                     |      | Backward elimination  |      |          |               |                     |               | Backward elimination  |               |                    |   |  |  |  |  |  |  |
|           |                    | OR                  |               | OR                    |               | OR       |   | OR                  |      | OR                    |      | OR       |               | OR                  |               | OR                    |               | OR                 |   |  |  |  |  |  |  |
|           |                    | (95% CI)            |               | (95% CI)              |               | (95% CI) |   | OR (95% CI)         |      | (95% CI)              |      | (95% CI) |               | OR (95% CI)         |               | (95% CI)              |               | OR (95% CI)        |   |  |  |  |  |  |  |
|           |                    | <i>p</i>            |               | <i>p</i>              |               | <i>p</i> |   | <i>p</i>            |      | <i>p</i>              |      | <i>p</i> |               | <i>p</i>            |               | <i>p</i>              |               | <i>p</i>           |   |  |  |  |  |  |  |
| FosAPR    | Age                |                     |               |                       |               |          |   |                     |      |                       |      |          |               |                     |               |                       |               |                    |   |  |  |  |  |  |  |
|           | ≥55                | 343                 | 1             | 1                     | —             | —        | — | 1                   | 1    | —                     | —    | —        | —             | 1                   | 1             | —                     | —             | —                  | — |  |  |  |  |  |  |
|           | <55                | 50                  | 0.842         | .616                  | 0.780         | .485     | — | 1.477               | .451 | 1.266                 | .660 | —        | 0.824         | .584                | 0.752         | .437                  | —             | —                  | — |  |  |  |  |  |  |
|           |                    |                     | (0.429–1.650) |                       | (0.388–1.566) |          |   | (0.536–4.066)       |      | (0.443–3.620)         |      |          | (0.413–1.645) |                     | (0.366–1.543) |                       |               |                    |   |  |  |  |  |  |  |
|           | Sex                |                     |               |                       |               |          |   |                     |      |                       |      |          |               |                     |               |                       |               |                    |   |  |  |  |  |  |  |
|           | Male               | 302                 | 1             | 1                     | —             | —        | — | 1                   | 1    | —                     | —    | —        | 1             | 1                   | —             | —                     | —             | —                  | — |  |  |  |  |  |  |
|           | Female             | 91                  | 2.133         | .003                  | 1.685         | .080     | — | 3.479               | .002 | 2.684                 | .036 | —        | 3.479         | .002                | 2.421         | <.001                 | 1.875         | .037               | — |  |  |  |  |  |  |
|           |                    |                     | (1.305–3.485) |                       | (0.940–3.020) |          |   | (1.610–7.518)       |      | (1.066–6.757)         |      |          | (1.610–7.518) |                     | (1.475–3.975) |                       | (1.039–3.385) |                    |   |  |  |  |  |  |  |
|           | Performance status |                     |               |                       |               |          |   |                     |      |                       |      |          |               |                     |               |                       |               |                    |   |  |  |  |  |  |  |
|           | 0                  | 260                 | 1             | 1                     | —             | —        | — | 1                   | 1    | —                     | —    | —        | 1             | 1                   | —             | —                     | —             | —                  | — |  |  |  |  |  |  |
|           | 1                  | 133                 | 1.493         | .082                  | 1.549         | .066     | — | 1.418               | .374 | 1.533                 | .297 | —        | 1.385         | .166                | 1.433         | .142                  | —             | —                  | — |  |  |  |  |  |  |
|           |                    |                     | (0.950–2.346) |                       | (0.971–2.469) |          |   | (0.656–3.064)       |      | (0.687–3.424)         |      |          | (0.873–2.195) |                     | (0.886–2.316) |                       |               |                    |   |  |  |  |  |  |  |
|           | Drinking history   |                     |               |                       |               |          |   |                     |      |                       |      |          |               |                     |               |                       |               |                    |   |  |  |  |  |  |  |
|           | 1                  |                     |               |                       |               |          |   |                     |      |                       |      |          |               |                     |               |                       |               |                    |   |  |  |  |  |  |  |
|           | Yes                | 181                 | 1             | 1                     | —             | —        | — | 1                   | 1    | —                     | —    | —        | 1             | 1                   | —             | —                     | —             | —                  | — |  |  |  |  |  |  |

| Treatment        | Overall (0–120 h)            |     |                      |          |                      |          |                       |          |                      |          | Delayed (24–120 h)   |          |                      |          |                       |          |                      |          |                      |          |                       |          |
|------------------|------------------------------|-----|----------------------|----------|----------------------|----------|-----------------------|----------|----------------------|----------|----------------------|----------|----------------------|----------|-----------------------|----------|----------------------|----------|----------------------|----------|-----------------------|----------|
| Group            | Factor                       | N   | Univariate analysis  |          |                      |          | Multivariate analysis |          |                      |          | Acute (0–24 h)       |          | Univariate analysis  |          | Multivariate analysis |          | Delayed (24–120 h)   |          | Univariate analysis  |          | Multivariate analysis |          |
|                  |                              |     | Backward elimination |          | Backward elimination |          | Backward elimination  |          | Backward elimination |          | Backward elimination |          | Backward elimination |          | Backward elimination  |          | Backward elimination |          | Backward elimination |          | Backward elimination  |          |
|                  |                              |     | OR                   | OR       | OR                   | OR       | OR                    | OR       | OR                   | OR       | OR                   | OR       | OR                   | OR       | OR                    | OR       | OR                   | OR       | OR                   | OR       | OR                    | OR       |
|                  |                              |     | (95% CI)             | <i>p</i> | (95% CI)             | <i>p</i> | (95% CI)              | <i>p</i> | OR (95% CI)          | <i>p</i> | (95% CI)             | <i>p</i> | (95% CI)             | <i>p</i> | (95% CI)              | <i>p</i> | (95% CI)             | <i>p</i> | (95% CI)             | <i>p</i> | (95% CI)              | <i>p</i> |
|                  | No or rarely                 | 212 | 1.458                | .095     | 1.205                | .461     | —                     | —        | 1.683                | .198     | 1.126                | .795     | —                    | —        | 1.544                 | .061     | 1.245                | .400     | —                    | —        | —                     | —        |
|                  |                              |     | (0.936–2.271)        |          | (0.734–1.976)        |          |                       |          | (0.762–3.720)        |          | (0.459–2.761)        |          |                      |          | (0.981–2.429)         |          | (0.747–2.075)        |          |                      |          |                       |          |
| Drinking history |                              |     |                      |          |                      |          |                       |          |                      |          |                      |          |                      |          |                       |          |                      |          |                      |          |                       |          |
| 2                |                              |     |                      |          |                      |          |                       |          |                      |          |                      |          |                      |          |                       |          |                      |          |                      |          |                       |          |
|                  | Regularly (once per day)     | —   | —                    | —        | —                    | —        | —                     | —        | —                    | —        | —                    | —        | —                    | —        | —                     | —        | —                    | —        | —                    | —        | —                     | —        |
|                  | Occasionally (once per week) | —   | —                    | —        | —                    | —        | —                     | —        | —                    | —        | —                    | —        | —                    | —        | —                     | —        | —                    | —        | —                    | —        | —                     | —        |
|                  | Rarely (once per month)      | —   | —                    | —        | —                    | —        | —                     | —        | —                    | —        | —                    | —        | —                    | —        | —                     | —        | —                    | —        | —                    | —        | —                     | —        |
|                  | No                           | —   | —                    | —        | —                    | —        | —                     | —        | —                    | —        | —                    | —        | —                    | —        | —                     | —        | —                    | —        | —                    | —        | —                     | —        |
| Smoking history  |                              |     |                      |          |                      |          |                       |          |                      |          |                      |          |                      |          |                       |          |                      |          |                      |          |                       |          |
| 1                |                              |     |                      |          |                      |          |                       |          |                      |          |                      |          |                      |          |                       |          |                      |          |                      |          |                       |          |
|                  | Yes                          | 321 | 1                    | —        | 1                    | —        | —                     | —        | 1                    | —        | 1                    | —        | —                    | —        | 1                     | —        | 1                    | —        | —                    | —        | 1                     | —        |



| Treatment Group            | Factor         | N           | Overall (0–120 h)      |                     |                        |                      |                             |                         | Acute (0–24 h)         |                         |                        |                      |                        |                        | Delayed (24–120 h)     |                        |                       |                        |      |  |
|----------------------------|----------------|-------------|------------------------|---------------------|------------------------|----------------------|-----------------------------|-------------------------|------------------------|-------------------------|------------------------|----------------------|------------------------|------------------------|------------------------|------------------------|-----------------------|------------------------|------|--|
|                            |                |             | Univariate analysis    |                     | Multivariate analysis  |                      |                             |                         | Univariate analysis    |                         | Multivariate analysis  |                      |                        |                        | Univariate analysis    |                        | Multivariate analysis |                        |      |  |
|                            |                |             |                        | Backward Full model |                        | Backward elimination |                             |                         |                        | Backward Full model     |                        | Backward elimination |                        |                        |                        | Backward Full model    |                       | Backward elimination   |      |  |
|                            |                | OR (95% CI) |                        | OR (95% CI)         |                        | OR (95% CI)          |                             | OR (95% CI)             |                        | OR (95% CI)             |                        | OR (95% CI)          |                        | OR (95% CI)            |                        | OR (95% CI)            |                       | OR (95% CI)            |      |  |
|                            |                | <i>p</i>    |                        | <i>p</i>            |                        | <i>p</i>             |                             | <i>p</i>                |                        | <i>p</i>                |                        | <i>p</i>             |                        | <i>p</i>               |                        | <i>p</i>               |                       | <i>p</i>               |      |  |
| Motion sickness            |                |             |                        |                     |                        |                      |                             |                         |                        |                         |                        |                      |                        |                        |                        |                        |                       |                        |      |  |
|                            | No             | 360         | 1                      | 1                   | 1                      | 1                    | 1                           | 1                       | —                      | —                       | —                      | —                    | 1                      | 1                      | 1                      | 1                      | 1                     | 1                      | 1    |  |
|                            | Yes            | 33          | 2.197<br>(1.066–4.529) | .033                | 2.052<br>(0.958–4.394) | .064                 | 2.181<br>(1.049–4.534)      | .037                    | 3.256<br>(1.222–8.678) | .018                    | 2.227<br>(0.781–6.350) | .134                 | —                      | 2.428<br>(1.176–5.014) | .016                   | 2.274<br>(1.055–4.898) | .036                  | 2.422<br>(1.159–5.061) | .019 |  |
| Pregnancy-related vomiting |                |             |                        |                     |                        |                      |                             |                         |                        |                         |                        |                      |                        |                        |                        |                        |                       |                        |      |  |
|                            | No             | 54          | 1                      | —                   | —                      | —                    | 1                           | —                       | —                      | —                       | —                      | —                    | 1                      | —                      | —                      | —                      | —                     | —                      | —    |  |
|                            | Yes            | 27          | 3.700<br>(1.403–9.754) | .008                | —                      | —                    | 1.136<br>(0.340–3.797)      | .835                    | —                      | —                       | —                      | —                    | 3.700<br>(1.403–9.754) | .008                   | —                      | —                      | —                     | —                      | —    |  |
|                            | Not applicable | 10          | 1.451<br>(0.362–5.821) | .600                | —                      | —                    | <0.001<br>(<0.001–>999.999) | .971                    | —                      | —                       | —                      | —                    | 1.451<br>(0.362–5.821) | .600                   | —                      | —                      | —                     | —                      | —    |  |
| Cancer type                |                |             |                        |                     |                        |                      |                             |                         |                        |                         |                        |                      |                        |                        |                        |                        |                       |                        |      |  |
|                            | Other          | 52          | 1                      | 1                   | —                      | —                    | 1                           | 1                       | —                      | —                       | —                      | —                    | 1                      | 1                      | —                      | —                      | —                     | —                      | —    |  |
|                            | Lung           | 341         | 0.818<br>(0.438–1.530) | .530                | 0.658<br>(0.334–1.294) | .225                 | —                           | 4.562<br>(0.607–34.269) | .140                   | 3.128<br>(0.396–24.716) | .280                   | —                    | 0.738<br>(0.394–1.383) | .343                   | 0.574<br>(0.289–1.137) | .111                   | —                     | —                      | —    |  |



| Treatment Group           | Extended            |               |                       |               | Extended             |               |                       |               | Beyond               |               |                       |               |                      |               |      |               |      |   |
|---------------------------|---------------------|---------------|-----------------------|---------------|----------------------|---------------|-----------------------|---------------|----------------------|---------------|-----------------------|---------------|----------------------|---------------|------|---------------|------|---|
| Factor                    | overall (0–168 h)   |               |                       |               | delayed (24–168 h)   |               |                       |               | delayed (120–168 h)  |               |                       |               |                      |               |      |               |      |   |
|                           | Univariate analysis |               | Multivariate analysis |               | Univariate analysis  |               | Multivariate analysis |               | Univariate analysis  |               | Multivariate analysis |               |                      |               |      |               |      |   |
|                           |                     |               | Full model            |               | Backward elimination |               | Full model            |               | Backward elimination |               | Full model            |               | Backward elimination |               |      |               |      |   |
|                           | OR                  | p             | OR                    | p             | OR                   | p             | OR                    | p             | OR                   | p             | OR                    | p             | OR                   | p             |      |               |      |   |
|                           | (95% CI)            |               | (95% CI)              |               | (95% CI)             |               | (95% CI)              |               | (95% CI)             |               | (95% CI)              |               | (95% CI)             |               |      |               |      |   |
| <b>Age</b>                |                     |               |                       |               |                      |               |                       |               |                      |               |                       |               |                      |               |      |               |      |   |
| ≥55                       | 343                 | 1             | 1                     | —             | 1                    | 1             | 1                     | —             | 1                    | 1             | 1                     | —             | 1                    | —             |      |               |      |   |
| <55                       | 50                  | 0.761         | .415                  | 0.683         | .274                 | —             | 0.734                 | .367          | 0.649                | .227          | —                     | 0.562         | .206                 | 0.571         | .283 | —             |      |   |
|                           |                     | (0.395–1.467) |                       | (0.344–1.353) |                      |               | (0.375–1.437)         |               | (0.322–1.309)        |               |                       | (0.230–1.373) |                      | (0.205–1.588) |      |               |      |   |
| <b>Sex</b>                |                     |               |                       |               |                      |               |                       |               |                      |               |                       |               |                      |               |      |               |      |   |
| Male                      | 302                 | 1             | 1                     | 1             | 1                    | 1             | 1                     | 1             | 1                    | 1             | 1                     | 1             | 1                    | —             |      |               |      |   |
| Female                    | 91                  | 2.351         | <.001                 | 1.959         | .021                 | 2.351         | <.001                 | 2.598         | <.001                | 2.130         | .010                  | 2.446         | <.001                | 2.170         | .006 | 1.540         | .283 | — |
|                           |                     | (1.453–3.804) |                       | (1.108–3.465) |                      | (1.453–3.804) |                       | (1.601–4.216) |                      | (1.201–3.780) |                       | (1.498–3.994) |                      | (1.251–3.765) |      | (0.700–3.388) |      |   |
| <b>Performance status</b> |                     |               |                       |               |                      |               |                       |               |                      |               |                       |               |                      |               |      |               |      |   |
| 0                         | 260                 | 1             | 1                     | —             | 1                    | 1             | 1                     | —             | 1                    | 1             | 1                     | —             | 1                    | —             |      |               |      |   |
| 1                         | 133                 | 1.425         | .113                  | 1.484         | .089                 | —             | 1.299                 | .249          | 1.343                | .214          | —                     | 1.692         | .047                 | 1.484         | .216 | —             |      |   |
|                           |                     | (0.919–2.209) |                       | (0.941–2.340) |                      |               | (0.833–2.025)         |               | (0.844–2.136)        |               |                       | (1.007–2.844) |                      | (0.795–2.771) |      |               |      |   |
| <b>Drinking history 1</b> |                     |               |                       |               |                      |               |                       |               |                      |               |                       |               |                      |               |      |               |      |   |
| Yes                       | 181                 | 1             | 1                     | —             | 1                    | 1             | 1                     | —             | 1                    | 1             | 1                     | —             | 1                    | —             |      |               |      |   |



| Treatment Group              | Extended            |               |                      |                       |          |                      | Extended            |          |                      |                       |          |                      | Beyond              |               |                      |                       |          |                      |
|------------------------------|---------------------|---------------|----------------------|-----------------------|----------|----------------------|---------------------|----------|----------------------|-----------------------|----------|----------------------|---------------------|---------------|----------------------|-----------------------|----------|----------------------|
| Factor                       | overall (0–168 h)   |               |                      |                       |          |                      | delayed (24–168 h)  |          |                      |                       |          |                      | delayed (120–168 h) |               |                      |                       |          |                      |
|                              | Univariate analysis |               |                      | Multivariate analysis |          |                      | Univariate analysis |          |                      | Multivariate analysis |          |                      | Univariate analysis |               |                      | Multivariate analysis |          |                      |
|                              | Full model          |               | Backward elimination | Full model            |          | Backward elimination | Full model          |          | Backward elimination | Full model            |          | Backward elimination | Full model          |               | Backward elimination | Full model            |          | Backward elimination |
|                              | OR                  | (95% CI)      | <i>p</i>             | OR                    | (95% CI) | <i>p</i>             | OR                  | (95% CI) | <i>p</i>             | OR                    | (95% CI) | <i>p</i>             | OR                  | (95% CI)      | <i>p</i>             | OR                    | (95% CI) | <i>p</i>             |
| No or rarely                 | 212                 | 1.588         | .034                 | 1.359                 | .209     | —                    | 1.626               | .028     | 1.358                | .219                  | —        | 1.373                | .230                | 1.060         | .864                 | —                     |          |                      |
|                              |                     | (1.035–2.436) |                      | (0.843–2.190)         |          |                      | (1.053–2.511)       |          | (0.834–2.209)        |                       |          | (0.818–2.303)        |                     | (0.543–2.072) |                      |                       |          |                      |
| Drinking history 2           |                     |               |                      |                       |          |                      |                     |          |                      |                       |          |                      |                     |               |                      |                       |          |                      |
| Regularly (once per day)     | —                   | —             | —                    | —                     | —        | —                    | —                   | —        | —                    | —                     | —        | —                    | —                   | —             | —                    | —                     | —        | —                    |
| Occasionally (once per week) | —                   | —             | —                    | —                     | —        | —                    | —                   | —        | —                    | —                     | —        | —                    | —                   | —             | —                    | —                     | —        | —                    |
| Rarely (once per month)      | —                   | —             | —                    | —                     | —        | —                    | —                   | —        | —                    | —                     | —        | —                    | —                   | —             | —                    | —                     | —        | —                    |
| No                           | —                   | —             | —                    | —                     | —        | —                    | —                   | —        | —                    | —                     | —        | —                    | —                   | —             | —                    | —                     | —        | —                    |
| Smoking history 1            |                     |               |                      |                       |          |                      |                     |          |                      |                       |          |                      |                     |               |                      |                       |          |                      |
| Yes                          | 321                 | 1             | —                    | 1                     | —        | —                    | 1                   | 1        | —                    | 1                     | —        | 1                    | 1                   | —             | —                    | —                     | —        | —                    |
| No                           | 72                  | 2.097         | .005                 | 1.408                 | .290     | —                    | 2.297               | .002     | 1.466                | .239                  | —        | 1.945                | .028                | 1.069         | .879                 | —                     |          |                      |
|                              |                     | (1.246–3.530) |                      | (0.748–2.652)         |          |                      | (1.361–3.874)       |          | (0.776–2.771)        |                       |          | (1.074–3.522)        |                     | (0.453–2.522) |                      |                       |          |                      |

| Treatment Group                                    | Extended            |               |                       |               | Extended             |          |                       |          | Beyond               |          |                       |          |                      |          |               |      |   |
|----------------------------------------------------|---------------------|---------------|-----------------------|---------------|----------------------|----------|-----------------------|----------|----------------------|----------|-----------------------|----------|----------------------|----------|---------------|------|---|
| Factor                                             | overall (0–168 h)   |               |                       |               | delayed (24–168 h)   |          |                       |          | delayed (120–168 h)  |          |                       |          |                      |          |               |      |   |
|                                                    | Univariate analysis |               | Multivariate analysis |               | Univariate analysis  |          | Multivariate analysis |          | Univariate analysis  |          | Multivariate analysis |          |                      |          |               |      |   |
|                                                    |                     |               | Full model            |               | Backward elimination |          | Full model            |          | Backward elimination |          | Full model            |          | Backward elimination |          |               |      |   |
|                                                    | OR                  |               | OR                    |               | OR                   |          | OR                    |          | OR                   |          | OR                    |          | OR                   |          |               |      |   |
|                                                    | (95% CI)            | <i>p</i>      | (95% CI)              | <i>p</i>      | (95% CI)             | <i>p</i> | (95% CI)              | <i>p</i> | (95% CI)             | <i>p</i> | (95% CI)              | <i>p</i> | (95% CI)             | <i>p</i> |               |      |   |
| Smoking history 2                                  |                     |               |                       |               |                      |          |                       |          |                      |          |                       |          |                      |          |               |      |   |
| Smoker                                             | —                   | —             | —                     | —             | —                    | —        | —                     | —        | —                    | —        | —                     | —        | —                    | —        |               |      |   |
| Stop smoking within 180 days before registration   | —                   | —             | —                     | —             | —                    | —        | —                     | —        | —                    | —        | —                     | —        | —                    | —        |               |      |   |
| Stop smoking prior to 180 days before registration | —                   | —             | —                     | —             | —                    | —        | —                     | —        | —                    | —        | —                     | —        | —                    | —        |               |      |   |
| Non-smoker                                         | —                   | —             | —                     | —             | —                    | —        | —                     | —        | —                    | —        | —                     | —        | —                    | —        |               |      |   |
| Motion sickness                                    |                     |               |                       |               |                      |          |                       |          |                      |          |                       |          |                      |          |               |      |   |
| No                                                 | 360                 | 1             | 1                     | —             | 1                    | 1        | 1                     | 1        | 1                    | 1        | 1                     | 1        | 1                    | —        |               |      |   |
| Yes                                                | 33                  | 2.322         | .021                  | 2.076         | .060                 | —        | 2.512                 | .012     | 2.256                | .036     | 2.143                 | .043     | 2.801                | .008     | 2.240         | .102 | — |
|                                                    |                     | (1.133–4.761) |                       | (0.971–4.438) |                      |          | (1.224–5.156)         |          | (1.053–4.834)        |          | (1.023–4.489)         |          | (1.309–5.994)        |          | (0.851–5.895) |      |   |

| Treatment             | Extended            |               |                      |                       |            |          | Extended             |          |               |                       |                      |          | Beyond              |          |                      |                       |  |  |
|-----------------------|---------------------|---------------|----------------------|-----------------------|------------|----------|----------------------|----------|---------------|-----------------------|----------------------|----------|---------------------|----------|----------------------|-----------------------|--|--|
| Group                 | overall (0–         |               |                      |                       |            |          | delayed (24–         |          |               |                       |                      |          | delayed (120–       |          |                      |                       |  |  |
| Factor                | N 168 h)            |               |                      |                       |            |          | 168 h)               |          |               |                       |                      |          | 168 h)              |          |                      |                       |  |  |
|                       | Univariate analysis |               |                      | Multivariate analysis |            |          | Univariate analysis  |          |               | Multivariate analysis |                      |          | Univariate analysis |          |                      | Multivariate analysis |  |  |
|                       | Full model          |               | Backward elimination |                       | Full model |          | Backward elimination |          | Full model    |                       | Backward elimination |          | Full model          |          | Backward elimination |                       |  |  |
|                       | OR                  |               | OR                   |                       | OR         |          | OR                   |          | OR            |                       | OR                   |          | OR                  |          | OR                   |                       |  |  |
|                       | (95% CI)            | <i>p</i>      | (95% CI)             | <i>p</i>              | (95% CI)   | <i>p</i> | (95% CI)             | <i>p</i> | (95% CI)      | <i>p</i>              | (95% CI)             | <i>p</i> | (95% CI)            | <i>p</i> | (95% CI)             | <i>p</i>              |  |  |
| Pregnancy-related     |                     |               |                      |                       |            |          |                      |          |               |                       |                      |          |                     |          |                      |                       |  |  |
| vomiting              |                     |               |                      |                       |            |          |                      |          |               |                       |                      |          |                     |          |                      |                       |  |  |
| No                    | 54                  | 1             | —                    | —                     | 1          | —        | —                    | —        | 1             | —                     | —                    | —        | 1                   | —        | —                    | —                     |  |  |
| Yes                   | 27                  | 4.037         | .006                 | —                     | —          | —        | 4.037                | .006     | —             | —                     | —                    | —        | 1.855               | .226     | —                    | —                     |  |  |
|                       |                     | (1.495–       |                      |                       |            |          | (1.495–              |          |               |                       |                      |          | (0.683–5.042)       |          |                      |                       |  |  |
|                       |                     | 10.906)       |                      |                       |            |          | 10.906)              |          |               |                       |                      |          |                     |          |                      |                       |  |  |
| Not applicable        | 10                  | 1.700         | .443                 | —                     | —          | —        | 1.700                | .443     | —             | —                     | —                    | —        | 1.352               | .692     | —                    | —                     |  |  |
|                       |                     | (0.438–6.604) |                      |                       |            |          | (0.438–6.604)        |          |               |                       |                      |          | (0.305–5.994)       |          |                      |                       |  |  |
| Cancer type           |                     |               |                      |                       |            |          |                      |          |               |                       |                      |          |                     |          |                      |                       |  |  |
| Other                 | 52                  | 1             | 1                    | —                     | 1          | —        | 1                    | —        | 1             | —                     | —                    | —        | 1                   | 1        | —                    | —                     |  |  |
| Lung                  | 341                 | 0.924         | .800                 | 0.692                 | .278       | —        | 0.852                | .610     | 0.632         | .180                  | —                    | —        | 0.641               | .204     | 0.540                | .166                  |  |  |
|                       |                     | (0.500–1.708) |                      | (0.355–1.347)         |            |          | (0.460–1.577)        |          | (0.324–1.236) |                       |                      |          | (0.322–1.273)       |          | (0.226–1.292)        |                       |  |  |
| CDDP dose             |                     |               |                      |                       |            |          |                      |          |               |                       |                      |          |                     |          |                      |                       |  |  |
| <80 mg/m <sup>2</sup> | 165                 | 1             | 1                    | —                     | 1          | —        | 1                    | —        | 1             | —                     | —                    | —        | 1                   | 1        | —                    | —                     |  |  |
| ≥80 mg/m <sup>2</sup> | 228                 | 1.243         | .320                 | 1.452                 | .109       | —        | 1.160                | .501     | 1.360         | .192                  | —                    | —        | 1.046               | .865     | 1.013                | .969                  |  |  |
|                       |                     | (0.809–1.910) |                      | (0.920–2.291)         |            |          | (0.752–1.790)        |          | (0.857–2.160) |                       |                      |          | (0.624–1.753)       |          | (0.544–1.886)        |                       |  |  |

| Treatment         | Extended            |          |                      |                       |          |                      | Extended            |          |                      |                       |          |                      | Beyond              |                |                      |                       |                |                      |        |                |       |
|-------------------|---------------------|----------|----------------------|-----------------------|----------|----------------------|---------------------|----------|----------------------|-----------------------|----------|----------------------|---------------------|----------------|----------------------|-----------------------|----------------|----------------------|--------|----------------|-------|
| Group             | overall (0–         |          |                      |                       |          |                      | delayed (24–        |          |                      |                       |          |                      | delayed (120–       |                |                      |                       |                |                      |        |                |       |
| Factor            | N 168 h)            |          |                      |                       |          |                      | 168 h)              |          |                      |                       |          |                      | 168 h)              |                |                      |                       |                |                      |        |                |       |
|                   | Univariate analysis |          |                      | Multivariate analysis |          |                      | Univariate analysis |          |                      | Multivariate analysis |          |                      | Univariate analysis |                |                      | Multivariate analysis |                |                      |        |                |       |
|                   | Full model          |          | Backward elimination | Full model            |          | Backward elimination | Full model          |          | Backward elimination | Full model            |          | Backward elimination | Full model          |                | Backward elimination | Full model            |                | Backward elimination |        |                |       |
|                   | OR                  | (95% CI) | <i>p</i>             | OR                    | (95% CI) | <i>p</i>             | OR                  | (95% CI) | <i>p</i>             | OR                    | (95% CI) | <i>p</i>             | OR                  | (95% CI)       | <i>p</i>             | OR                    | (95% CI)       | <i>p</i>             |        |                |       |
| Treatment failure |                     |          |                      |                       |          |                      |                     |          |                      |                       |          |                      |                     |                |                      |                       |                |                      |        |                |       |
| in 0–120 h        |                     |          |                      |                       |          |                      |                     |          |                      |                       |          |                      |                     |                |                      |                       |                |                      |        |                |       |
| No                | 279                 | —        | —                    | —                     | —        | —                    | —                   | —        | —                    | —                     | —        | —                    | 1                   | —              | —                    | 1                     | —              | —                    | 1      |                |       |
| Yes               | 114                 | —        | —                    | —                     | —        | —                    | —                   | —        | —                    | —                     | —        | —                    | 16.437              | (8.806–30.681) | <.001                | 14.673                | (7.755–27.762) | <.001                | 16.437 | (8.806–30.681) | <.001 |

Data were obtained from the full analysis set.

*h* hours, *OR* odds ratio, *CI* confidence interval, *CDDP* cisplatin, *FosAPR* fosaprepitant, *FosNTP* fosnetupitant

Figure S1 Comparison of the time to treatment failure curve classified by the number of risk factors at 0–168 hours in the neurokinin 1 receptor antagonist-evaluable population. **a** No risk factors; **b** One or more risk factors

a. No risk factors.

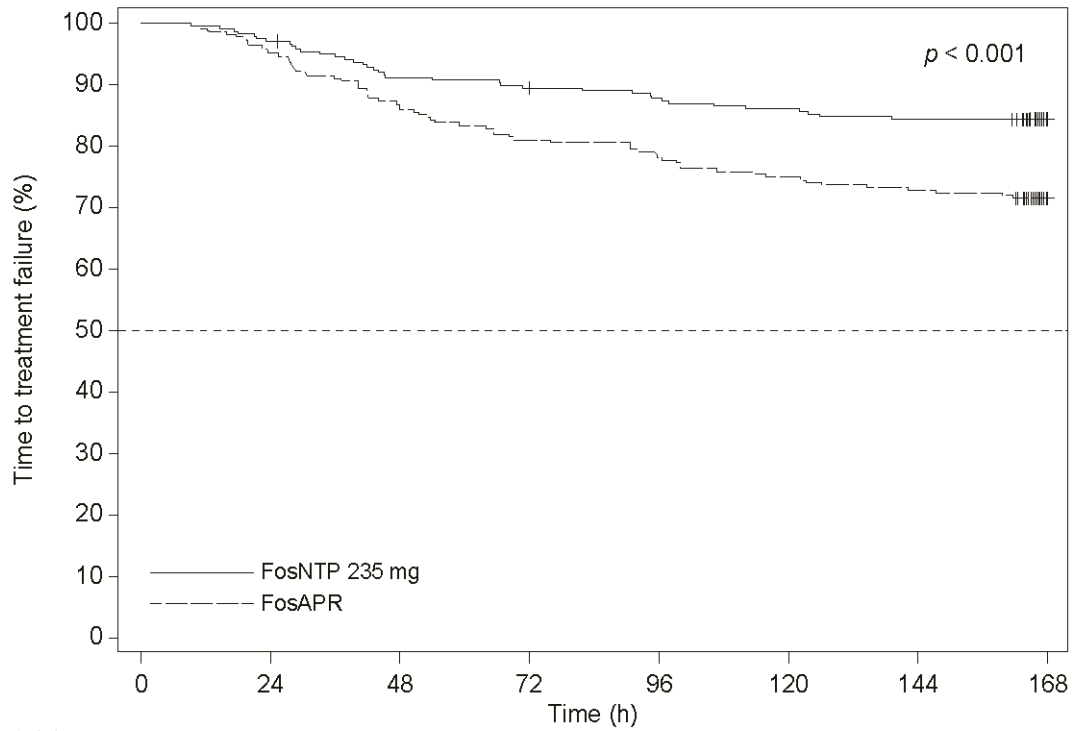

| Number at risk |  | 0   | 24  | 48  | 72  | 96  | 120 | 144 | 168 |
|----------------|--|-----|-----|-----|-----|-----|-----|-----|-----|
| FosNTP 235 mg  |  | 238 | 231 | 216 | 212 | 207 | 203 | 199 | 167 |
| FosAPR         |  | 302 | 287 | 262 | 245 | 235 | 226 | 219 | 183 |

b. One or more risk factors.

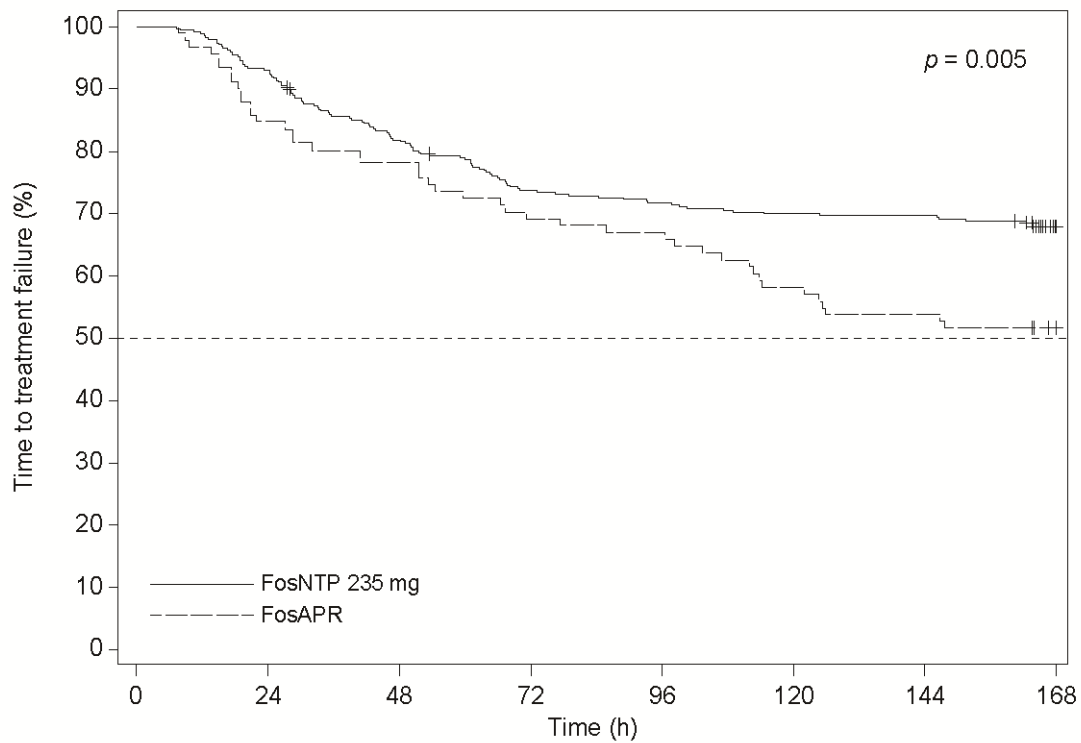

| Number at risk |  | 0   | 24  | 48  | 72  | 96  | 120 | 144 | 168 |
|----------------|--|-----|-----|-----|-----|-----|-----|-----|-----|
| FosNTP 235 mg  |  | 348 | 324 | 283 | 254 | 247 | 241 | 240 | 212 |
| FosAPR         |  | 91  | 77  | 71  | 63  | 61  | 53  | 49  | 43  |
